# Platelet response during the second cycle of decitabine treatment predicts response and survival for myelodysplastic syndrome patients

Hyun Ae Jung<sup>1,2</sup>, Chi Hoon Maeng<sup>3</sup>, Moonjin Kim<sup>1</sup>, Sungmin Kim<sup>1</sup>, Chul Won Jung<sup>1</sup>, and Jun Ho Jang<sup>1</sup>

<sup>1</sup> Division of Hematology-Oncology, Department of Medicine, Samsung Medical Center, Sungkyunkwan University School of Medicine, Seoul, Korea

<sup>2</sup> Division of Hematology-Oncology, Department of Medicine, Hallym University Medical Center, Hallym University College of Medicine, Dontan, Korea

<sup>3</sup> Division of Hemato-Oncology, Department of Internal Medicine, Kyung Hee University Medical Center, Seoul, Korea

Correspondence to: Jun Ho Jang, email: jh21.jang@samsung.com

Keywords: myelodysplastic syndrome, platelet

Received: November 12, 2014

Accepted: March 21, 2015

Published: April 23, 2015

This is an open-access article distributed under the terms of the Creative Commons Attribution License, which permits unrestricted use, distribution, and reproduction in any medium, provided the original author and source are credited.

## ABSTRACT

**Despite the efficacy of decitabine to myelodysplastic syndrome (MDS), there is a wide range of responses, and no definite predictive marker has been identified. This study aimed to describe the efficacy of decitabine and to identify potential predictors of response and survival in patients with MDS. We retrospectively analyzed clinical data of MDS patients at Samsung Medical Center between August 2008 and August 2011. The response assessment was conducted using the International Working Group (IWG) response criteria for MDS. We analyzed 101 MDS patients (total 613 cycles) who received decitabine for a median of four cycles. The overall response was 52.5% ( $n = 53/101$ ). The median time to any response was two cycles with the median overall survival of 16.7 months. Patients who showed hematologic improvement had significantly longer survival than those who did not (9.8 vs. 22.9 months,  $p = 0.004$ ). The difference in OS was evident in the Intermediate-2/High risk group ( $p = 0.002$ ) but not in the Intermediate-1 risk group ( $p = 0.145$ ). Multivariate analysis confirmed that platelet response (no platelet transfusions for at least 3 days) during the second cycle of treatment was an independent predictor for response, OS and Leukemia free survival. Based on the results of this study, for patients with hematological improvement, recovery of platelet count by the second cycle of therapy can be used as an early predictive marker of improved survival and an increased response rate.**

## INTRODUCTION

Myelodysplastic syndromes (MDS) are a group of clonal hematopoietic disorders marked by ineffective hematopoiesis, peripheral cytopenias, and an increased risk of transformation to acute myeloid leukemia. MDS is associated with a wide array of clinical manifestations and treatment outcomes.

MDS treatment is based on prognostic factors that predict survival and likelihood of progression to AML. Currently, development of prognostic systems that allow for risk stratification and that can guide the timing and choice of MDS therapy is needed. The

International Prognostic Scoring System (IPSS) remains the most widely used prognostic system for therapeutic decisions. The IPSS advises the use of supportive care with transfusion and growth factor supplementation as treatment in lower risk groups of patients. Allogeneic stem cell transplantation is the only curative treatment for the high risk group; however, in the post-epigenetic therapy era, treatment approaches for patients with MDS have improved significantly. Specifically, hypomethylating agents improve the transfusion requirement and quality of life while decreasing leukemic transformation and survival. Azacitidine [1-3] and decitabine [4-6] are currently the two available agents with the capacity to

induce DNA hypomethylation in vivo. Recently, DNA methyltransferase inhibitors have become the mainstay of MDS treatment since being approved in the United States and Europe for the treatment of higher risk MDS (i.e., intermediate-2 and high risk, according to the IPSS guidelines). Azacitidine has been studied in higher-risk MDS patients in two randomized multicenter trials, which include Cancer and Leukemia Group B (CALGB) 9221 [7] and AZA-001 [1]. Decitabine, a DNA-methyltransferase inhibitor, has a wide range of overall response rates from 30%-60% based on literature published in Western countries [4, 8-10] and Korea [11]. However, the non-response rate for hypomethylating agents is high. Additionally, there are few studies investigating the treatment response in Asian populations, and there is no known predictive marker for response to decitabine therapy. It is known that pretreatment risk stratification is related to MDS patient survival outcome. Therefore, we aimed to assess the efficacy of decitabine and to identify predictors of response to decitabine therapy.

## RESULTS

### Patient characteristics

We identified 101 consecutive patients who received decitabine as first-line treatment for MDS and had available clinical and pathologic data between January 2008 and December 2011. Patient demographics are described in Table 1. The median age was 65 years (range, 18-84 years old), and 30% of the patients were women. There was no significant difference in the baseline characteristics of responding and non-responding patients.

### Treatment response

A total of 613 cycles of decitabine treatment were administered in 101 patients with MDS. The median follow-up period was 20.7 months (range: 1.0-89.6 months). The median number of decitabine treatment cycles was four (range: 1-34 cycles). The median number of cycles to any response was two (range: 1-17 cycles), and the median time to best response was 2.3 months (Table 6). Of the patients who received decitabine, the overall response rate (ORR, Complete response(CR), Partial response(PR), Marrow complete response(mCR) and Hematologic improvement(HI)) was observed in 51 of 101 patients (50.5%) (Table 2). Among the patients that responded to decitabine treatment, 37 (72.5%) showed a treatment response within two cycles of treatment, and 14 patients (27.5%) showed a treatment response after two cycles of decitabine treatment (Table 3). Platelet response during decitabine treatment was indicated in 48 patients

(47.5%), most of whom demonstrated a response (N = 31, 64.6%) within two cycles of decitabine therapy.

### Predictive factors of treatment response and survival

The median overall survival duration in all the patients was 16.7 months (range, 0.9-60.8 months). Univariate analysis showed that IPSS, the WHO classification-based Prognostic Scoring System (WPSS) and the platelet response during the second cycle of decitabine all significantly predicted favorable ORR, OS and LFS (Table 4, Table 5 and Figure 1).

Figure 2 shows the relationship between m-CR and OS in patients with bone marrow blasts >5%. The OS in patients with marrow complete remission (m-CR) was not significantly different compared to that of patients without m-CR ( $p$ -value = 0.353). However, the patients who showed hematologic improvement (HI) had a significantly higher survival rate than those who did not (11.8 vs. 23.8 months,  $p$  = 0.001) (Table 6.). The median OS in patients without HI during or after decitabine treatment was 9.8 months, and the median OS in patients with HI was 22.9 months ( $p$ -value = 0.004, Figure 3). The difference in OS was evident in the Intermediate-2/High risk group ( $p$ -value = 0.002) but not in the Intermediate-1 risk group ( $p$ -value 0.145, Figure 3).

Multivariate analysis indicated that the platelet response during the second cycle of decitabine treatment significantly predicted ORR, OS and LFS (Table 7).

## DISCUSSION

The results of this study suggest that the platelet response that occurs during the second cycle of decitabine can predict the overall response and survival of MDS patients.

Currently, genetic oncology faces the challenge of identifying patients who will be benefit from target agents. Therefore, biomarkers that can guide clinical decisions and predict the response to treatment are needed. Additionally, identifying patients who will derive the greatest clinical benefit from hypomethylating agents remains a challenge; however, this could be resolved by identifying biomarkers that predict patient response.

Unlike conventional chemotherapy, several cycles of treatment with a hypomethylating agent are often needed to appreciate the effect of the therapy. In both the CALGB 9221 and AZA-001 azacitidine trials, several courses of therapy (four to six cycles) were required to achieve a response. In a small portion of patients, responses could be observed after up to 12 cycles of therapy. Therefore, the ability to predict response to treatment at an earlier time is needed.

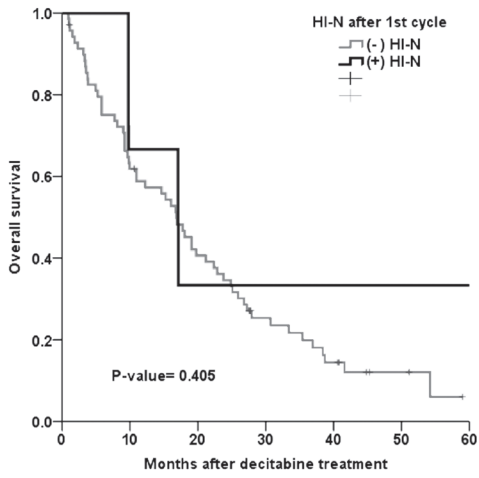

A. HI-N after 1<sup>st</sup> cycle

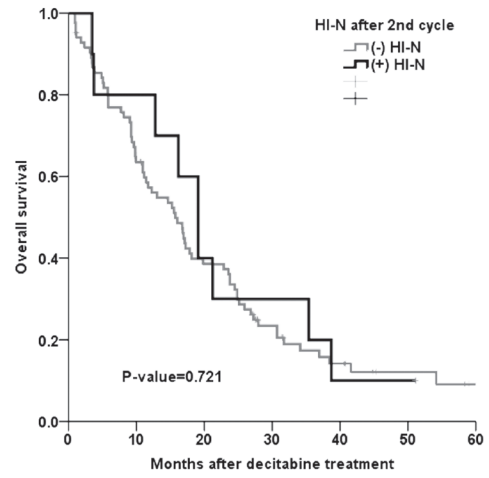

B. HI-N after 2<sup>nd</sup> cycle

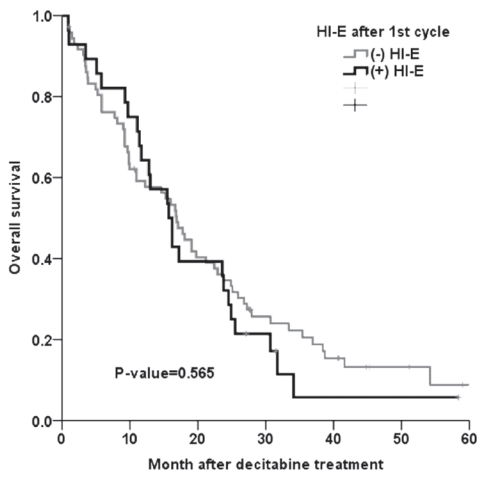

C. HI-E after 1<sup>st</sup> cycle

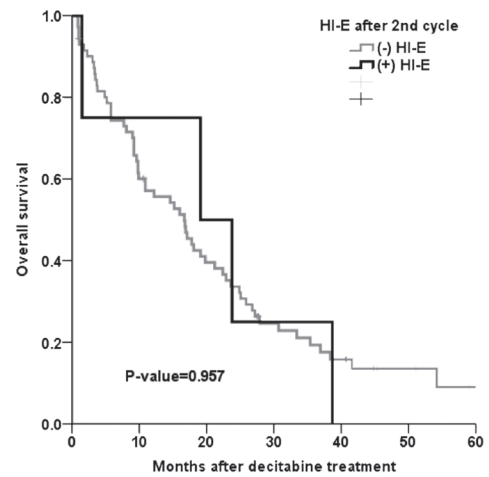

D. HI-E after 2<sup>nd</sup> cycle

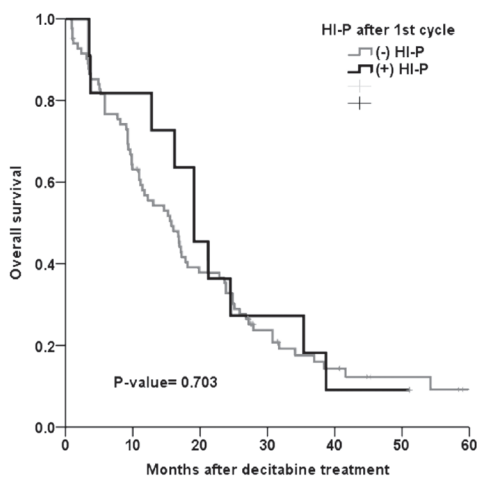

E. HI-P after 1<sup>st</sup> cycle

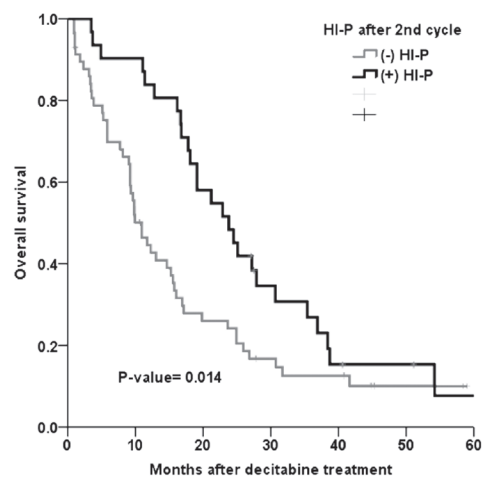

F. HI-P after 2<sup>nd</sup> cycle

**Figure 1: Hematologic improvement and OS.** A. HI-N after first cycle B. HI-N after second cycle C. HI-E after first cycle D. HI-E after second cycle E. HI-P after first cycle F. HI-P after second cycle.

**Table 1: Patient characteristics.**

| Characteristic                 | Total<br>N = 101 | Non-responsive | Responsive | p-value |
|--------------------------------|------------------|----------------|------------|---------|
| Age (years)                    |                  |                |            | 0.234   |
| 65 or less                     | 48(47.5%)        | 27(56.3%)      | 21 (43.8%) |         |
| Over 65                        | 53(52.5%)        | 23(43.4%)      | 30(56.6%)  |         |
| Sex                            |                  |                |            | 0.561   |
| Male                           | 71(70.3%)        | 35(49.3%)      | 36(50.7%)  |         |
| Female                         | 30(29.7%)        | 15(50%)        | 15(50.0%)  |         |
| WHO subtype                    |                  |                |            | 0.771   |
| RA/RARS/RDS-U                  | 5(5.0%)          | 2(40.0%)       | 3(60.0%)   |         |
| RCMD/RCMD-RS                   | 27(26.7%)        | 16(59.3%)      | 11(40.7%)  |         |
| RAEB-1                         | 21(20.8%)        | 11(52.4%)      | 10(47.6%)  |         |
| RAEB-2                         | 32(31.7%)        | 14(43.8%)      | 18(56.3%)  |         |
| CMML                           | 16(15.8%)        | 7(43.8%)       | 9(56.3%)   |         |
| WPSS risk category             |                  |                |            | 0.731   |
| Very low/Low                   | 10(9.9%)         | 5(50.0%)       | 5(50.0%)   |         |
| Intermediate                   | 13(12.9%)        | 8(61.5%)       | 5(38.5%)   |         |
| High                           | 43(42.5%)        | 19(44.2%)      | 24(55.8%)  |         |
| Very high                      | 19(18.8%)        | 11(57.9%)      | 8(42.1%)   |         |
| IPSS risk category             |                  |                |            | 0.604   |
| Low                            | 7(6.9%)          | 5(71.4%)       | 2(28.6%)   |         |
| INT-1                          | 45(44.6%)        | 20(44.4%)      | 25(55.6%)  |         |
| INT-2                          | 38(37.6%)        | 19(50.0%)      | 19(50.0%)  |         |
| High                           | 11(10.9%)        | 6(54.5%)       | 5(45.5%)   |         |
| IPSS cytogenetic risk category |                  |                |            | 0.130   |
| Good                           | 52(51.5%)        | 20(38.5%)      | 32(61.5%)  |         |
| Intermediate                   | 24(23.8%)        | 18(75.0%)      | 6(25.0%)   |         |
| High                           | 25(24.8%)        | 12(48.0%)      | 13(52.0%)  |         |

**Table 2: Decitabine treatment response.**

| Response           | No. of patients (%) N=101 |
|--------------------|---------------------------|
| CR+PR              | 17(16.8%)                 |
| m CR with HI       | 9(8.9%)                   |
| m CR without HI    | 7(6.9%)                   |
| HI only            | 18(17.8%)                 |
| SD                 | 14(13.9%)                 |
| Failure            | 36(35.6%)                 |
| CR+PR+m CR         | 33(32.7%)                 |
| CR+PR+m CR+HI      | 51(50.5%)                 |
| CR+PR+m CR+ HI +SD | 65(64.4%)                 |
| HI-N               | 30(29.7%)                 |
| HI-E               | 39(38.6%)                 |
| HI-P               | 48(47.5%)                 |

CR, Complete response; PR, Partial response; HI, Hematologic improvement; SD, Stable disease; HI-N, Hematologic improvement in neutrophils; HI-E, Hematologic improvement in erythroids; HI-P, Hematologic improvement in platelets.

**Table 3: Decitabine treatment time to response.**

|                              | Median no. of decitabine cycles (range) |
|------------------------------|-----------------------------------------|
| Time to any response         | 2(1-17)                                 |
| Time to hematologic response | 2(1-17)                                 |
| Time to any HI               | 2(1-17)                                 |
| Time to HI-N                 | 6 (1-13)                                |
| Time to HI-E                 | 3(1-17)                                 |
| Time to HI-P                 | 2(1-13)                                 |

HI-N, Hematologic improvement in neutrophils; HI-E, Hematologic improvement in erythroids; HI-P, Hematologic improvement in platelets.

**Table 4: Prognostic factors of overall response and overall survival.**

|                                | OS (months) | <i>p</i> -value | LFS (months) | <i>p</i> -value |
|--------------------------------|-------------|-----------------|--------------|-----------------|
| Age (years)                    |             | 0.871           |              | 0.367           |
| 65 or less                     | 16.0        |                 | 9.8          |                 |
| Over 65                        | 16.7        |                 | 16.2         |                 |
| Sex                            |             | 0.361           |              | 0.307           |
| Male                           | 16.9        |                 | 16.2         |                 |
| Female                         | 12.8        |                 | 11.2         |                 |
| WHO subtype                    |             | 0.130           |              | 0.170           |
| RA/RARS/RDS-U                  | 20.5        |                 | 14.0         |                 |
| RCMD/RCMD-RS                   | 19.4        |                 | 22.4         |                 |
| RAEB-1                         | 17.7        |                 | 3.8          |                 |
| RAEB-2                         | 16.0        |                 | 10.8         |                 |
| CMML                           | 13.8        |                 | 11.2         |                 |
| WPSS risk category             |             | 0.04            |              | 0.06            |
| Very low/Low                   | 42.4        |                 | 42.4         |                 |
| Intermediate                   | 38.6        |                 | 24.0         |                 |
| High                           | 19.8        |                 | 21.2         |                 |
| Very high                      | 10.9        |                 | 8.5          |                 |
| IPSS risk category             |             | 0.024           |              | 0.003           |
| Low                            | 30.7        |                 | 22.1         |                 |
| INT-1                          | 19.1        |                 | 21.2         |                 |
| INT-2                          | 12.8        |                 | 9.0          |                 |
| High                           | 10.9        |                 | 5.3          |                 |
| IPSS cytogenetic risk category |             | 0.415           |              | 0.438           |
| Good                           | 19.1        |                 | 21.2         |                 |
| Intermediate                   | 11.7        |                 | 8.5          |                 |
| High                           | 15.7        |                 | 12.1         |                 |

LFS, Leukemia-free survival; OS, Overall survival.

There exist very few studies about hypomethylating agent predictive markers in MDS patients. In previous studies, pretreatment risk stratification was based on IPSS or WPSS, and initial LDH level was beneficial for OS in patients treated with azacitidine [12, 13]. Previous low dose ara-C treatment, bone marrow blasts >15%, poor performance and more than four units of red blood cells transfused every eight weeks were factors that predicted a lower response rate to 5-azacitidine [14]. In addition, some reports demonstrated that specific cytogenetic

abnormalities may be associated with a better response to hypomethylating agents [15, 16]. Recently, specific molecular mutations in the methylation pathway have been identified, including *TET2*, *DNMT3A* and *IDH/IDH2* [17-19]; however, these methylation machinery genes were detected in only 10-30% of MDS patients [20, 21].

Lee et al. [11] demonstrated that decitabine treatment prolonged OS in patients that achieved hematologic improvement. Previous randomized trials reported significant prolongation of OS or LFS in higher

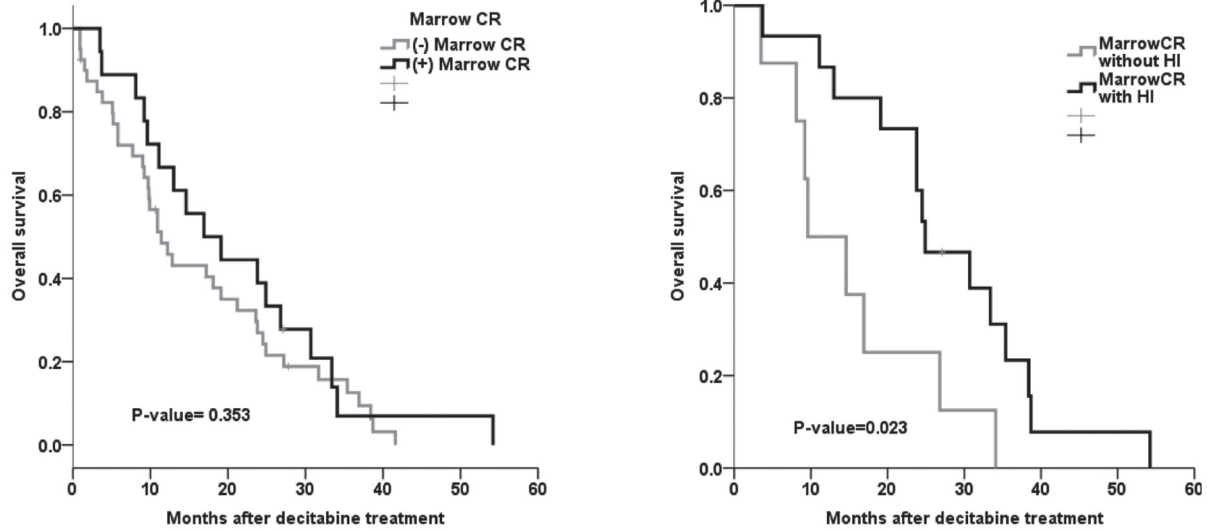

**Figure 2: m-CR and OS in patients with BM blasts >5%.**

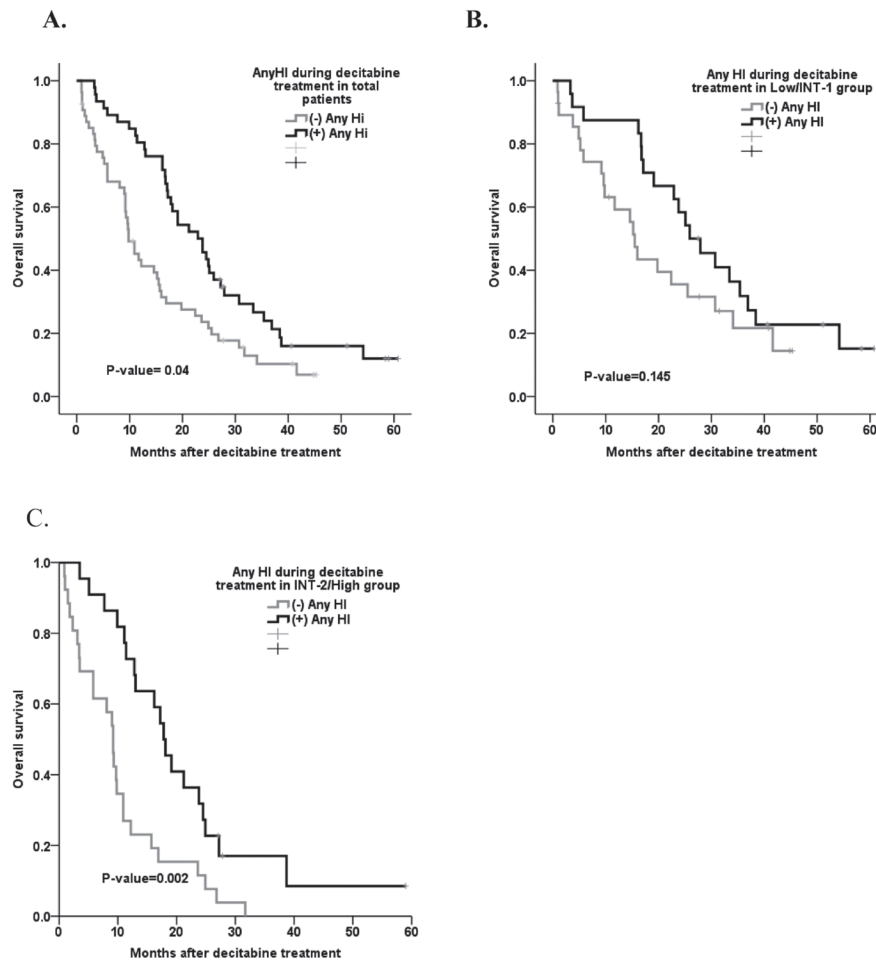

**Figure 3: Survival curve based on the presence of hematologic improvement during treatment. A.** Any HI in all patients during decitabine treatment ( $p$ -value = 0.040). **B.** Any HI in Low risk (IPSS INT-1/Low) patients during decitabine treatment ( $p$ -value = 0.145). **C.** Any HI in High risk (IPSS INT-2/High) patients during decitabine treatment ( $p$ -value = 0.002).

**Table 5: HI and ORR/OS.**

|              | ORR (%) | p-value | OS (months) | p-value | LFS (months) | p-value |
|--------------|---------|---------|-------------|---------|--------------|---------|
| First cycle  |         |         |             |         |              |         |
| HI-N         |         | 0.114   |             | 0.405   |              | 0.951   |
| No           | 47.9    |         | 16.8        |         | 14.0         |         |
| Yes          | 52.1    |         | 17.8        |         | 14.0         |         |
| HI-E         |         | 0.742   |             | 0.565   |              | 0.912   |
| No           | 51.1    |         | 16.9        |         | 12.1         |         |
| Yes          | 50.0    |         | 15.7        |         | 11.5         |         |
| HI-P         |         | 0.079   |             | 0.703   |              | 0.705   |
| No           | 46.4    |         | 15.7        |         | 12.1         |         |
| Yes          | 62.1    |         | 19.1        |         | 16.2         |         |
| Second cycle |         |         |             |         |              |         |
| HI-N         |         | 0.250   |             | 0.721   |              | 0.903   |
| No           | 44.4    |         | 15.7        |         | 12.1         |         |
| Yes          | 75.0    |         | 19.1        |         | 17.5         |         |
| HI-E         |         | 0.079   |             | 0.957   |              | 0.976   |
| No           | 47.1    |         | 16.7        |         | 11.2         |         |
| Yes          | 71.8    |         | 19.1        |         | 17.5         |         |
| HI-P         |         | <0.001  |             | 0.014   |              | 0.019   |
| No           | 26.4    |         | 10.9        |         | 7.1          |         |
| Yes          | 86.1    |         | 23.2        |         | 18.1         |         |

ORR, Overall response rate; HI-N, Hematologic improvement in neutrophils; HI-E, Hematologic improvement in erythrocytes; HI-P, Hematologic improvement in platelets.

**Table 6: Relationship between mCR and OS in patients with BM blasts >5% .**

|               |                | Median OS (months) | p-value |
|---------------|----------------|--------------------|---------|
| Marrow CR (+) |                | 21.2               | 0.023   |
|               | Presence of HI | 9.6                |         |
|               | Absence of HI  | 24.9               |         |

**Table 7: Multivariate analysis for ORR, OS and LFS.**

|                     | ORR     |         |            | OS      |         |           | LFS     |         |           |
|---------------------|---------|---------|------------|---------|---------|-----------|---------|---------|-----------|
|                     | Exp (B) | p-value | 95% CI     | Exp (B) | p-value | 95% CI    | Exp (B) | p-value | 95% CI    |
| Second cycle HI-P   | 25.6    | <0.001  | 7.42-91.0  | 0.58    | 0.031   | 0.36-0.95 | 0.54    | 0.014   | 0.33-0.88 |
| IPSS (Low vs. High) | 2.2     | 0.05    | 0.974-4.73 | 1.35    | 0.058   | 0.96-1.84 | 1.41    | 0.025   | 1.04-1.92 |

95% CI, 95% confidence interval.

risk MDS patients receiving hypomethylating agents, but these agents did not lower the disease risk [4]. Similarly, our results showed that the patients who showed HI exhibited significantly increased survival compared to patients who did not show HI. The patients who showed hematologic improvements (HI) had significantly longer survival rates than those who did not (11.8 vs 23.8 months,  $p = 0.001$ ) (Table 6). In comparison, the OS in patients with mCR was not statistically different compared to that of those without m-CR. Specifically, we noted that HI was achieved and indicated by the platelet response.

Few reports have analyzed platelet response as a predictive factor of patient survival [22, 23]. Decitabine has a 20%-50% response rate for thrombocytopenia in MDS patients. Decitabine enhances normal megakaryocyte outgrowth and differentiation of normal megakaryocytes into platelets [24]. Platelet level has often been observed as the first response to treatment, whereas red cell count and neutrophilic granulocyte count respond later during therapy. The neutrophil response may be delayed due to the slow disappearance of blasts from the bone marrow [23]. Hypomethylation of genes important

for megakaryopoiesis may be functionally linked by 5-aza-2'-deoxycytidine. This hypothesis is based on the observed hypermethylated promoter region of the p15 tumor suppressor gene [22]. Liekee et al. reported that a two-fold increase in platelet count after the first cycle of azacitidine treatment predicted longer OS and may be a useful early indicator of favorable azacitidine treatment outcome [23] in MDS and AML patients. The results indicated that 16% of patients with MDS and AML had an increased platelet count after the first cycle of azacitidine, which was associated with a significantly better OS rate. However, in this study, only seven MDS patient who received azacitidine had an increased platelet count. In our study, most MDS patients (N=31/48, 64.6%) showed an increased platelet count within two cycles of decitabine. By the second cycle, the platelet response was a significant predictive factor for OS and LFS after adjusting for known predictors (IPSS).

Our study was limited because of its retrospective nature. Additional studies that include a larger number of patients treated homogeneously with hypomethylating agents are needed for external validation. In the future, we will use Sanger sequencing to investigate mutations in methylating machinery genes (TET2 and DNMT3A) in patients who receive decitabine as a first-line treatment. Two hypomethylating agents are currently available. However, only azacitidine has been shown to be associated with prolonged survival in prospective study until now. In our study, patients received decitabine treatment. Hypomethylating agents are considered today as the first line treatment for MDS patients classified as INT-2 and High-risk IPSS. However, in this study, 49.8% of the patient population are classified as Low and INT-1. In this respect, our study has limitation.

In conclusion, decitabine is effective (ORR 50.5%) and can cause a rapid platelet response that is apparent by the second treatment cycle in MDS patients. Overall survival is significantly longer in patients with hematologic improvement. Based on the results of this study, for patients with hematological improvement, recovery of platelets by the second cycle of therapy can be used as an early predictive marker of improved survival and an increased response rate.

## **MATERIALS AND METHODS**

### **Patients**

We retrospectively analyzed the medical records of patients who were diagnosed with MDS (de novo or secondary) based on the World Health Organization (WHO) classifications. This study was approved by the Samsung Medical Center Institutional Review Board.

## **Treatment**

Decitabine was given intravenously over one hour at a dose of 20 mg/m<sup>2</sup> daily for five consecutive days, and each course was repeated every four weeks. All patients received decitabine treatment as first-line treatment. Physicians were advised to continue decitabine treatment for at least four courses unless a patient either died, experienced unacceptable adverse events, or withdrew from the study. Bone marrow examination was conducted with every two courses until complete remission (CR) was confirmed. Prophylactic antimicrobials, hematopoietic growth factors and other supportive care were administered at the discretion of the treating physician.

## **Response criteria**

The response assessment was conducted using the International Working Group (IWG) response criteria for myelodysplasia [25]. The hematologic response was evaluated during each cycle, and patients who were classified as high or intermediate-2 according to the IPSS underwent a bone marrow biopsy to evaluate their response to treatment. A complete response (CR) required the disappearance of all signs and symptoms, a bone marrow biopsy with less than 5% blasts, peripheral blood count with an absolute neutrophil count of  $1 \times 10^9/L$  or more, and a platelet count of  $100 \times 10^9/L$  or more. A marrow-CR (mCR) was defined as a bone marrow blast less than 5% that did not meet peripheral blood count criteria. A partial response (PR) was defined as a reduction in the blast count to less than 50% but more than 5%. Response criteria for CR and PR required a treatment duration of at least four weeks. All HI was determined based on the modified IWG criteria. The HI are measured in patients with pretreatment abnormal values: hemoglobin level less than 110 g/L (11g/dL) or RBC-transfusion dependence, platelet count less than  $100 \times 10^9/L$  or platelet-transfusion dependence, absolute neutrophil count (ANC) less than  $1.0 \times 10^9/L$ . Pretreatment baseline measures of cytopenias are averages of at least 2 measurements (not influenced by transfusions, ie, no RBC transfusions for at least 1 week and no platelet transfusions for at least 3 days) over at least 1 week prior to therapy.

Major and minor HI must last for at least 8 weeks. An overall response rate (ORR) was defined according to CR, PR, mCR and HI. Overall survival was measured from the date of initiation of decitabine therapy to the date of death or the last follow-up visit. Leukemia-free survival was measured from the date of initiation of decitabine therapy to the date of death or leukemic transformation.



## Statistical analysis

Patient characteristics were compared using the Chi-square and Fisher's exact test (categorical variables) between responsive and non-responsive patients who received decitabine treatment. Survival time was estimated using the Kaplan-Meier method, and statistical differences were compared using log-rank analysis. Multivariate analysis was performed using stepwise Cox proportional hazards regression modeling to assess the independent prognostic role of each clinicopathologic variable in OS and LFS. A stepwise multiple logistic regression was used to determine ORR. Statistical analyses were performed using SPSS 19.0 (SPSS Inc., Chicago, IL), and statistical significance was considered at  $p \leq 0.05$ .

## ACKNOWLEDGEMENTS

Hyun Ae Jung and Jun Ho Jang conceived and designed the experiments. Hyun Ae Jung analyzed the data and wrote the paper. Moonjin Kim, Sungmin Kim, Chi Hoon Maeng and Chul Won Jung contributed to the writing of the paper. Jun Ho Jang edited the manuscript. There were no sources of funding. No authors have financial disclosures or personal relationships with other people or organizations that could inappropriately influence this work.

## CONFLICTS OF INTEREST STATEMENT

The authors do not have any financial disclosures or personal relationships with other people or organizations that could inappropriately influence this work.

## REFERENCES

1. Fenaux P, Mufti GJ, Hellstrom-Lindberg E, Santini V, Finelli C, Giagounidis A, Schoch R, Gattermann N, Sanz G, List A, Gore SD, Seymour JF, Bennett JM, Byrd J, Backstrom J, Zimmerman L, McKenzie D, Beach C and Silverman LR. Efficacy of azacitidine compared with that of conventional care regimens in the treatment of higher-risk myelodysplastic syndromes: a randomised, open-label, phase III study. *Lancet Oncol.* 2009; 10:223-232.
2. Santini V. Azacitidine: activity and efficacy as an epigenetic treatment of myelodysplastic syndromes. *Expert Rev Hematol.* 2009; 2:121-127.
3. Ritchie EK. Safety and efficacy of azacitidine in the treatment of elderly patients with myelodysplastic syndrome. *Clin Interv Aging.* 2012; 7:165-173.
4. Kantarjian H, Issa JP, Rosenfeld CS, Bennett JM, Albitar M, DiPersio J, Klimek V, Slack J, de Castro C, Ravandi F, Helmer R, 3rd, Shen L, Nimer SD, Leavitt R, Raza A and Saba H. Decitabine improves patient outcomes in myelodysplastic syndromes: results of a phase III randomized study. *Cancer.* 2006; 106:1794-1803.
5. Kantarjian HM, O'Brien S, Huang X, Garcia-Manero G, Ravandi F, Cortes J, Shan J, Davisson J, Bueso-Ramos CE and Issa JP. Survival advantage with decitabine versus intensive chemotherapy in patients with higher risk myelodysplastic syndrome: comparison with historical experience. *Cancer.* 2007; 109:1133-1137.
6. Kantarjian HM, O'Brien S, Shan J, Aribi A, Garcia-Manero G, Jabbour E, Ravandi F, Cortes J, Davisson J and Issa JP. Update of the decitabine experience in higher risk myelodysplastic syndrome and analysis of prognostic factors associated with outcome. *Cancer.* 2007; 109:265-273.
7. Silverman LR, Demakos EP, Peterson BL, Kornblith AB, Holland JC, Odchimar-Reissig R, Stone RM, Nelson D, Powell BL, DeCastro CM, Ellerton J, Larson RA, Schiffer CA and Holland JF. Randomized controlled trial of azacitidine in patients with the myelodysplastic syndrome: a study of the cancer and leukemia group B. *J Clin Oncol.* 2002; 20:2429-2440.
8. Wijermans P, Lubbert M, Verhoef G, Bosly A, Ravoet C, Andre M and Ferrant A. Low-dose 5-aza-2'-deoxycytidine, a DNA hypomethylating agent, for the treatment of high-risk myelodysplastic syndrome: a multicenter phase II study in elderly patients. *J Clin Oncol.* 2000; 18:956-962.
9. Kantarjian H, Oki Y, Garcia-Manero G, Huang X, O'Brien S, Cortes J, Faderl S, Bueso-Ramos C, Ravandi F, Estrov Z, Ferrajoli A, Wierda W, Shan J, Davis J, Giles F, Saba HI and Issa JP. Results of a randomized study of 3 schedules of low-dose decitabine in higher-risk myelodysplastic syndrome and chronic myelomonocytic leukemia. *Blood.* 2007; 109:52-57.
10. Steensma DP, Baer MR, Slack JL, Buckstein R, Godley LA, Garcia-Manero G, Albitar M, Larsen JS, Arora S, Cullen MT and Kantarjian H. Multicenter study of decitabine administered daily for 5 days every 4 weeks to adults with myelodysplastic syndromes: the alternative dosing for outpatient treatment (ADOPT) trial. *J Clin Oncol.* 2009; 27:3842-3848.
11. Lee JH, Jang JH, Park J, Park S, Joo YD, Kim YK, Kim HG, Choi CW, Kim SH, Park SK, Park E and Min YH. A prospective multicenter observational study of decitabine treatment in Korean patients with myelodysplastic syndrome. *Haematologica.* 2011; 96:1441-1447.
12. Moon JH, Kim SN, Kang BW, Chae YS, Kim JG, Baek JH, Park JH, Song MK, Chung JS, Won JH, Lee SM, Joo YD, Kim YK, Kim HJ, Jo DY and Sohn SK. Predictive value of pretreatment risk group and baseline LDH levels in MDS patients receiving azacitidine treatment. *Ann Hematol.* 2010; 89:681-689.
13. Park MJ, Kim HJ, Kim SH, Kim DH, Kim SJ, Jang JH, Kim K, Kim WS and Jung CW. Is International Prognostic Scoring System (IPSS) still standard in predicting prognosis in patients with myelodysplastic syndrome? External validation of the WHO Classification-Based Prognostic

- Scoring System (WPSS) and comparison with IPSS. *Eur J Haematol.* 2008; 81:364-373.
14. Itzykson R, Thepot S, Quesnel B, Dreyfus F, Beyne-Rauzy O, Turlure P, Vey N, Recher C, Dartigeas C, Legros L, Delaunay J, Salanoubat C, Visanica S, Stamatoullas A, Isnard F, Marfaing-Koka A, de Botton S, Chelghoum Y, Taksin AL, Plantier I, Ame S, Boehrer S, Gardin C, Beach CL, Ades L and Fenaux P. Prognostic factors for response and overall survival in 282 patients with higher-risk myelodysplastic syndromes treated with azacitidine. *Blood.* 2011; 117:403-411.
  15. Lubbert M, Wijermans P, Kunzmann R, Verhoef G, Bosly A, Ravoet C, Andre M and Ferrant A. Cytogenetic responses in high-risk myelodysplastic syndrome following low-dose treatment with the DNA methylation inhibitor 5-aza-2'-deoxycytidine. *Br J Haematol.* 2001; 114:349-357.
  16. Najfeld V, Chen A, Scalise A, Ambinder EP, Fernandez G and Waxman S. Myelodysplastic syndrome transforming to acute promyelocytic-like leukemia with trisomy and rearrangement of chromosome 11. *Genes Chromosomes Cancer.* 1994; 10:15-25.
  17. Traina F, Visconte V, Elson P, Tabarrokki A, Jankowska AM, Hasrouni E, Sugimoto Y, Szpurka H, Makishima H, O'Keefe CL, Sekeres MA, Advani AS, Kalaycio M, Copelan EA, Sauntharajah Y, Olalla Saad ST, Maciejewski JP and Tiu RV. Impact of molecular mutations on treatment response to DNMT inhibitors in myelodysplasia and related neoplasms. *Leukemia.* 2014; 28:78-87.
  18. Walter MJ, Ding L, Shen D, Shao J, Grillot M, McLellan M, Fulton R, Schmidt H, Kalicki-Veizer J, O'Laughlin M, Kandath C, Baty J, Westervelt P, DiPersio JF, Mardis ER, Wilson RK, Ley TJ and Graubert TA. Recurrent DNMT3A mutations in patients with myelodysplastic syndromes. *Leukemia.* 2011; 25:1153-1158.
  19. Lin J, Yao DM, Qian J, Chen Q, Qian W, Li Y, Yang J, Wang CZ, Chai HY, Qian Z, Xiao GF and Xu WR. Recurrent DNMT3A R882 mutations in Chinese patients with acute myeloid leukemia and myelodysplastic syndrome. *PLoS One.* 2011; 6:e26906.
  20. Cazzola M, Della Porta MG and Malcovati L. The genetic basis of myelodysplasia and its clinical relevance. *Blood.* 2013; 122:4021-4034.
  21. Bejar R and Ebert BL. The genetic basis of myelodysplastic syndromes. *Hematol Oncol Clin North Am.* 2010; 24:295-315.
  22. van den Bosch J, Lubbert M, Verhoef G and Wijermans PW. The effects of 5-aza-2'-deoxycytidine (Decitabine) on the platelet count in patients with intermediate and high-risk myelodysplastic syndromes. *Leuk Res.* 2004; 28:785-790.
  23. van der Helm LH, Alhan C, Wijermans PW, van Marwijk Kooy M, Schaafsma R, Biemond BJ, Beeker A, Hoogendoorn M, van Rees BP, de Weerd O, Wegman J, Libourel WJ, Luykx-de Bakker SA, Minnema MC, Brouwer RE, Croon-de Boer F, Eefting M, Jie KS, van de Loosdrecht AA, Koedam J, Veeger NJ, Vellenga E and Huls G. Platelet doubling after the first azacitidine cycle is a promising predictor for response in myelodysplastic syndromes (MDS), chronic myelomonocytic leukaemia (CMML) and acute myeloid leukaemia (AML) patients in the Dutch azacitidine compassionate named patient programme. *Br J Haematol.* 2011; 155:599-606.
  24. Wang J, Yi Z, Wang S and Li Z. The effect of decitabine on megakaryocyte maturation and platelet release. *Thromb Haemost.* 2011; 106:337-343.
  25. Cheson BD, Greenberg PL, Bennett JM, Lowenberg B, Wijermans PW, Nimer SD, Pinto A, Beran M, de Witte TM, Stone RM, Mittelman M, Sanz GF, Gore SD, Schiffer CA and Kantarjian H. Clinical application and proposal for modification of the International Working Group (IWG) response criteria in myelodysplasia. *Blood.* 2006; 108:419-425.
